# Supplementary material for: 賢慮と責任 : 「責任の時代」における解釈学的倫理学の意義と限界
Source: MDPI journal article supplement (doi:10.3390/biomedicines9091136), 1995-02-01
Supplement: s1 [file s1]

## SUPPLEMENTARY MATERIALS

### *Supplementary Figure S1. Overexpression of the motif-only construct in SH-SY5Y cells results in widespread cell death*

Phase contrast light microscopy images of SH-SY5Y cells transduced with (a) motif alone and (b) full length VL30 constructs. Ten million cells were plated in T-175 flasks and allowed to grow with and without doxycycline for 48 hours. Left panels represent non doxycycline-treated cells, while right panels represent doxycycline-treated cells. Cells transduced with the motif only construct and treated with doxycycline did not proliferate and the majority died after 48 hours, as revealed by their lower cell density and dull appearance. In contrast, other cultures remained healthy after 48 hours.

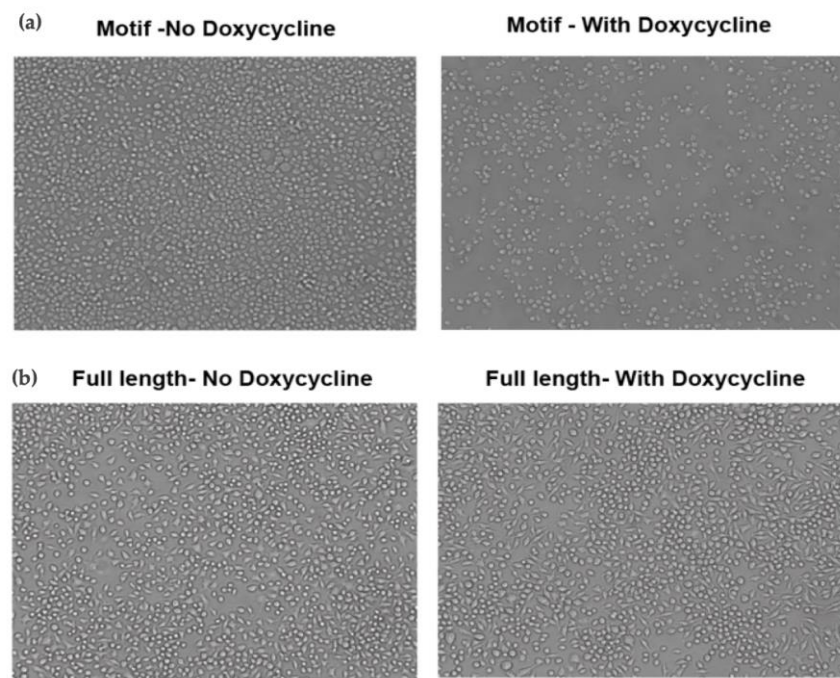

**Supplementary Table S1A.** Top 20 RNAs most enriched in exosomes

| Rank | Gene Symbol   | Gene Name                                                                               | Fold Change | Adjusted P-value |
|------|---------------|-----------------------------------------------------------------------------------------|-------------|------------------|
| 1    | A130040M12Rik | RIKEN cDNA A130040M12 gene (VL30 retroelement)                                          | 190.0       | 8.6E-09          |
| 2    | Gm20186       | predicted gene, 20186                                                                   | 44.0        | 5.9E-04          |
| 3    | Gm29673       | predicted gene, 29673                                                                   | 35.5        | 3.8E-03          |
| 4    | Gm6993        | predicted gene 6993                                                                     | 28.6        | 1.5E-04          |
| 5    | Gm20269       | predicted gene, 20269                                                                   | 28.2        | 3.7E-03          |
| 6    | Myo18b        | myosin XVIIIb                                                                           | 19.8        | 2.3E-04          |
| 7    | Gm20752       | predicted gene, 20752                                                                   | 16.0        | 1.1E-04          |
| 8    | Cux2          | cut-like homeobox 2                                                                     | 14.4        | 8.5E-05          |
| 9    | Mafa          | v-maf musculoaponeurotic fibrosarcoma oncogene family, protein A (avian)                | 13.8        | 2.4E-04          |
| 10   | Rnf144a       | ring finger protein 144A                                                                | 13.1        | 9.5E-03          |
| 11   | BC005512      | cDNA sequence BC005512                                                                  | 12.2        | 2.1E-03          |
| 12   | Slc17a7       | solute carrier family 17 (sodium-dependent inorganic phosphate cotransporter), member 7 | 11.6        | 2.4E-04          |
| 13   | Gm12505       | predicted gene 12505                                                                    | 11.2        | 8.7E-05          |
| 14   | Rap1gap2      | RAP1 GTPase activating protein 2                                                        | 11.0        | 4.6E-03          |
| 15   | Metrn         | meteorin, glial cell differentiation regulator                                          | 10.6        | 3.1E-04          |
| 16   | Gm6139        | predicted gene 6139                                                                     | 10.2        | 1.1E-04          |
| 17   | Plekhh2       | pleckstrin homology domain containing, family H (with MyTH4 domain) member 2            | 10.1        | 9.3E-04          |
| 18   | Csf3          | colony stimulating factor 3 (granulocyte)                                               | 9.9         | 9.9E-03          |
| 19   | Lmo1          | LIM domain only 1                                                                       | 9.8         | 9.7E-05          |
| 20   | Cntn2         | contactin 2                                                                             | 9.7         | 3.5E-04          |

**Supplementary Table S1B.** Top 20 RNAs most enriched in cells

| No. | Gene Symbol | Gene Name                                                                         | Log Fold Change | Adjusted P-value |
|-----|-------------|-----------------------------------------------------------------------------------|-----------------|------------------|
| 1   | Ndnf        | neuron-derived neurotrophic factor                                                | 64.9            | 6.94E-07         |
| 2   | Ighv6-3     | immunoglobulin heavy variable 6-3                                                 | 55.3            | 1.32E-06         |
| 3   | Mir142      | microRNA 142                                                                      | 49.5            | 8.63E-07         |
| 4   | Tcaf2       | TRPM8 channel-associated factor 2                                                 | 46.2            | 1.60E-06         |
| 5   | Scube1      | signal peptide, CUB domain, EGF-like 1                                            | 44.6            | 6.77E-06         |
| 6   | Flt3        | FMS-like tyrosine kinase 3                                                        | 44.3            | 7.31E-07         |
| 7   | Malat1      | metastasis associated lung adenocarcinoma transcript 1 (non-coding RNA)           | 43.4            | 1.48E-05         |
| 8   | Tmtc2       | transmembrane and tetratricopeptide repeat containing 2                           | 42.5            | 8.94E-06         |
| 9   | Scn4b       | sodium channel, type IV, beta                                                     | 41.4            | 3.20E-07         |
| 10  | Spata31d1b  | spermatogenesis associated 31 subfamily D, member 1B                              | 37.8            | 6.82E-06         |
| 11  | Il18r1      | interleukin 18 receptor 1                                                         | 37.8            | 2.99E-07         |
| 12  | Nipal1      | NIPA-like domain containing 1                                                     | 37.5            | 6.66E-06         |
| 13  | Kit         | kit oncogene                                                                      | 36.3            | 8.96E-07         |
| 14  | Ocln        | occludin                                                                          | 35.5            | 1.69E-06         |
| 15  | Slamf1      | signaling lymphocytic activation molecule family member 1                         | 34.5            | 1.85E-05         |
| 16  | Sema7a      | sema domain, immunoglobulin domain (Ig), and GPI membrane anchor, (semaphorin) 7A | 34.3            | 2.09E-07         |
| 17  | Tnni3       | troponin I, cardiac 3                                                             | 33.6            | 1.72E-06         |
| 18  | Fosb        | FBJ osteosarcoma oncogene B                                                       | 33.1            | 1.18E-07         |
| 19  | Adcy6       | adenylate cyclase 6                                                               | 32.9            | 2.91E-08         |
| 20  | Ceacam15    | carcinoembryonic antigen-related cell adhesion molecule 15                        | 32.7            | 3.83E-08         |
